1 **Evaluation of ERIC-PCR and MALDI-TOF as typing tools for multidrug resistant *Klebsiella***  
2 ***pneumoniae* clinical isolates from a tertiary care center in India**

3 Jyoti Kundu<sup>1</sup>, Shubhangi Kansal<sup>1</sup>, Shivali Rathore<sup>1</sup>, Meenakshi Kaundal<sup>1</sup>, Archana Angrup<sup>1\*</sup>, Manisha  
4 Biswal<sup>1</sup>, Kamini Walia<sup>2</sup>, Pallab Ray<sup>1</sup>

5 <sup>1</sup> Department of Medical Microbiology, Postgraduate Institute of Medical Education and Research,  
6 Chandigarh, India

7 <sup>2</sup>Division of Epidemiology and Communicable Diseases, Indian Council of Medical Research, New Delhi,  
8 India

9 \* Corresponding author, Email ID: archanaangrup@yahoo.com

10

11 **Abstract**

12 **Background and Aim:** Multidrug resistant *Klebsiella pneumoniae* is associated with nosocomial  
13 infections in both outbreak and non-outbreak situations. The study intends to evaluate the potential of  
14 enterobacterial repetitive intergenic consensus- polymerase chain reaction (ERIC-PCR), a genomic based  
15 typing and matrix-assisted laser desorption ionization time-of-flight mass spectrometry (MALDI-TOF MS)  
16 proteomic-based typing techniques for clonal relatedness among multidrug resistant *Klebsiella pneumoniae*  
17 isolates.

18 **Methodology:** Multidrug resistant clinical isolates of *Klebsiella pneumoniae* ( $n=137$ ) were collected from  
19 March 2019 to February 2020. Identification and protein-based phylogenetic analysis were performed by  
20 MALDI-TOF MS. Genomic typing was done by ERIC-PCR and analyzed by an online data analysis service  
21 (PyElph). Dice method with unweighted pair group method with arithmetic mean (UPGMA) program was  
22 used to compare the ERIC profiles. The samples were also evaluated by PCR for the presence of genes

23 encoding carbapenemases, extended spectrum beta lactamases (ESBLs) and mobile colistin resistance-1  
24 (*mcrI*).

25 **Result and Conclusion:** Isolates were typed into 40 ERIC types, and six groups by MALDI-TOF-MS.  
26 PCR-based analysis revealed that all the strains harbored two or more ESBL and carbapenemase genes.  
27 None of the isolates revealed the presence of the plasmid mediated *mcr-I* gene for colistin resistance. The  
28 study presents ERIC based typing as more robust in comparison to MALDI-TOF for finding the clonal  
29 relatedness in epidemiological studies.

30 **Key Words:** Klebsiella pneumoniae, Multidrug resistance, ERIC, MALDI, Epidemiological typing

### 31 **Introduction**

32 *Klebsiella pneumoniae* is an opportunistic gram-negative bacterium accounting for approximately one third  
33 of all hospital and community acquired infections. These include pneumonia, surgical wound infections,  
34 meningitis, urinary tract infections and blood stream infections (1). Increase in the incidence and prevalence  
35 of multidrug resistant (MDR) *K. pneumoniae* has been associated with therapeutic failures, prolonged  
36 hospitalization, high mortality rates and a significant economic burden (2). In the last two decades, there  
37 has been a tremendous increase in infections caused by multiple drug resistant gram-negative bacteria,  
38 including those resistant to the last resort drugs like carbapenems and colistin (3,4). The World Health  
39 Organization has prioritized *Klebsiella pneumoniae* as a target for the development of newer antimicrobials  
40 for the treatment of nosocomial infections (5). Several transmission dynamics studies in both outbreak and  
41 non-outbreak situations for ESBL-producing *K. pneumoniae* infections have shown the presence of high  
42 clonal diversity (6–8).

43 Molecular typing techniques are powerful tools used to determine clustering among multidrug resistant  
44 (MDR) *K. pneumoniae* and to derive information about their transmission. We used enterobacterial  
45 repetitive intergenic consensus- polymerase chain reaction (ERIC-PCR) and matrix-assisted laser  
46 desorption ionization time-of-flight (MALDI-TOF) to assess clonality of *K. pneumoniae* isolates. MALDI  
47 typing relies on the microbial proteomic spectra (fingerprints) clustering, whereas ERIC-PCR relies on the

48 fingerprints due to the presence of multiple copies of conserved consensus sequences in the genomes of  
49 bacteria for epidemiological surveillance (9).

## 50 **Material and Methods:**

### 51 **Bacterial Isolation and Identification:**

52 A total of 137 non-duplicate MDR *K. pneumoniae* isolates were collected from blood, respiratory, and  
53 abscess specimens received in the Department of Medical Microbiology, Postgraduate Institute of Medical  
54 Education and Research, Chandigarh, India (PGIMER) from March 2019 to February 2020. Isolates were  
55 confirmed as *K. pneumoniae* by MALDI -TOF MS (Bruker Daltoniks, Bremen GmbH Germany). Samples  
56 were cultured and incubated overnight at 37°C. Information regarding the type of sample (bronchoalveolar  
57 lavage, endotracheal aspirate, sputum, blood, wound swab, and abscess drainage), age and sex of patients  
58 and type of admission (inpatient/ward/unit/outpatient) were extracted from the hospital information system.  
59 Institutional ethical approval to carry out the study has been obtained (IEC-11/2018-1048).

### 60 **Antimicrobial susceptibility testing:**

61 Antimicrobial susceptibility of the isolates was performed by the VITEK 2 system against ceftazidime,  
62 ceftriaxone, cefepime, ertapenem, imipenem, meropenem, aztreonam, ampicillin-sulbactam, piperacillin-  
63 tazobactam, ciprofloxacin, levofloxacin, amikacin, gentamicin, tigecycline and trimethoprim-  
64 sulfamethoxazole. The broth microdilution method was performed for minimum inhibitory concentration  
65 (MIC) of colistin. *Escherichia coli* ATCC 25922 was used as quality control strain for antibiotic  
66 susceptibility tests. Results were interpreted following Clinical and Laboratory Standards Institute (CLSI)  
67 guidelines (M-100, Ed 2019) (10). Strains not susceptible to at least one agent in three or more antimicrobial  
68 classes were defined as multidrug-resistant and were used in the study.

### 69 **Detection of genes conferring resistance to carbapenems, $\beta$ -lactams and mobile colistin resistance-1:**

70 Total DNA of all the isolates of *K. pneumoniae* was extracted using the boiling method and further used to  
71 detect the presence of the following genes – *bla*<sub>NDM</sub>, *bla*<sub>KPC</sub>, *bla*<sub>OXA1</sub> and *bla*<sub>OXA48</sub>, *bla*<sub>VIM</sub>, *bla*<sub>CTXM-15</sub>, *bla*<sub>SHV</sub>,  
72 *bla*<sub>TEM</sub>, and *bla*<sub>IMP</sub>. PCR assays were carried out using specific primers as described by Dallenne *et al* (11)

73 and detection of plasmid mediated colistin resistance was performed using universal primer for CLR5  
74 region of *mcr1* gene. *K. pneumoniae* ATCC 1705 was used as a standard positive control strain for *bla*<sub>SHV</sub>  
75 and *bla*<sub>KPC</sub>. For the other genes, in-house strains known to harbor the genes (and confirmed by targeted  
76 Sanger sequencing) were used as positive controls. A non-ESBL producing organism (*E. coli* ATCC 25922)  
77 was used as a negative control. Primers used for amplification are listed in supplementary file.

#### 78 **Enterobacterial Repetitive Intergenic Consensus- Polymerase Chain Reaction (ERIC-PCR):**

79 ERIC-PCR technique was carried out in thermocycler (Thermo ABI Veriti™ Biosystems) using ERIC  
80 primers-forward: 5'-ATG TAA GCT CCT GGG GAT TCAC-3' and reverse: 5'-AAG TAA GTG ACT  
81 GGG GTG AGC G3'. The PCR protocol consisted of an initial denaturation cycle at 95°C for 5 min,  
82 followed by 30 cycles of denaturation at 94°C for 1 min, annealing at 48°C for 1 min, extension at 72 °C  
83 for 1 min, and a final cycle of amplification at 72°C for 10 min. PCR products were loaded on 1.5% agarose  
84 gel (Lonza SeaKem LE Agarose) at constant voltage of 70V for one hour, and the banding patterns were  
85 visualized under ultraviolet radiation (supplementary file). ERIC patterns were analyzed by online data  
86 analysis service of PyElph (12). ERIC profiles were compared using Dice similarity matrix coefficient and  
87 clustered by neighbor joining method to prepare the phylogenetic tree. Isolates with two or more different  
88 bands in ERIC banding pattern were considered as different ERIC type. The dendrogram was drawn  
89 according to the clusters (Fig1).

#### 90 **Matrix-assisted laser desorption ionization time-of-flight (MALDI-TOF) typing:**

91 Identification and phylogenetic analysis of all the isolates was performed according to the method  
92 prescribed by Bruker Daltonik, GmbH. In brief, a single bacterial colony was homogenously smeared onto  
93 a target spot on a reusable steel plate (MSP 96 target polished steel BC) using a sterile wooden toothpick.  
94 Bacterial components were crystalized by overlaying each spot with 1µl of saturated  $\alpha$ -cyano-4-  
95 hydroxycinnamic acid matrix solution (10mg/ml conc. of HCCA powder in 50% acetonitrile with 2.5%  
96 trifluoroacetic acid). Each spot was air-dried at room temperature. Mass spectra of all the isolates were  
97 acquired automatically using default identification settings of FlexControl Software with linear positive

98 mode, mass range 2-20kDa. The final spectrum was the sum of 20 single spectra, each obtained by 200  
99 laser shots on random target spot positions. The raw spectrum obtained were processed and classified with  
100 the help of MALDI BioTyper software, version 3.1. The standard interpretative criteria for Bruker were  
101 applied. A phylogenetic tree (Fig 2) was constructed from main spectrum profiles of all the isolates using  
102 FlexControl software (version 3.4.127.0) and BioTyper software (version 3.1).

### 103 **Discriminatory index (D):**

104 The discriminatory indices (D) of MALDI-TOF and ERIC-PCR were calculated based on Simpson's Index  
105 of Diversity formula (13) as below:

$$106 \quad D=1-(\sum n(n-1)/N(N-1))$$

107 Where D is diversity index, N is the total number of individual strains in the sample population and n is the  
108 number of isolates of a particular type/cluster. Simpson's index of diversity ranges from 0.0 to 1.0 where  
109 value equal to 1.0 is highly discriminatory, and a value of 0.0 represents that all the isolates are of an  
110 identical type.

111

## 112 **Results**

113 **Clinical isolates.** Total 137 multidrug resistant *K. pneumoniae* clinical isolates from endotracheal aspirates,  
114 sputum and bronchoalveolar lavage (n=30), wound pus (n=62), body fluids, CSF (n= 7), and blood (n=38)  
115 were included (Fig 3). Lactose fermenting colonies on MacConkey agar were further identified by MALDI-  
116 TOF MS.

### 117 **Polymerase chain reaction-based detection of extended spectrum beta-lactamases and** 118 **carbapenemase-encoding genes:**

119 Among the various genes tested, all the isolates expressed at least two antimicrobial resistance genes, 95%  
120 isolates expressed *bla*<sub>TEM</sub> followed by *bla*<sub>CTXM-15</sub> (~88%). Amongst the carbapenemase genes tested,  
121 maximum expression was for *bla*<sub>OXA</sub> (~88%) followed by *bla*<sub>NDM</sub> (~54%) as indicated in Table1 and Fig 4.

122 **Table 1: PCR based ESBL and carbapenemase gene expression analysis**

| Genes tested | Positive | Percentage |
|--------------|----------|------------|
| TEM          | 129      | 94.85      |
| SHV          | 105      | 77.21      |
| CTXM-15      | 120      | 88.24      |
| KPC          | 72       | 52.94      |
| OXA1 and 48  | 120      | 88.24      |
| VIM          | 70       | 51.47      |
| NDM-1        | 73       | 53.68      |
| IMP          | 28       | 20.59      |

123

124 **Molecular fingerprinting by ERIC-PCR:**

125 The number of bands varied from 1 to 11 with the size ranging from 100 bp to more than 1.5kb. A total of  
126 40 different ERIC profiles (E-types) were observed designated as E1 to E40. Out of 137 isolates, total 44  
127 isolates belonged to E1, 8 isolates to E2, 17 isolates to E11, 12 isolates to E19 type, 2 each to E5, E6, E12,  
128 E13, E16, E31, E33, E24, E10=6 isolates, E7 and E35=4 each, E21=3 and other remaining 24 isolates  
129 showed a unique pattern. To further investigate probable outbreak of MDR *K. pneumoniae* infection, ERIC  
130 typing data was mapped in relation to hospital unit/ward (Fig 5). Details of the same has been provided in  
131 the supplementary file.

132 **Matrix assisted laser desorption ionization time of flight analysis:** Isolates were allotted into 6 groups  
133 *i.e.*, G1 to G6 by MALDI-TOF analysis. G1=3 isolates, G2=10 isolates, G3=26 isolates, G4=1 isolate, G5=4  
134 isolates and G6=93 isolates.

135 **Discriminatory potential of ERIC-PCR and MALDI-TOF in typing of *K. pneumoniae* isolates:** The  
136 Simpson's Diversity Index was calculated for ERIC-PCR, and MALDI-TOF analysis as depicted in the  
137 table below. ERIC -PCR was found to be more discriminatory (D=0.8704) for clonal relatedness and was  
138 a better phylotyping tool in comparison to MALDI-TOF typing (D=0.5001).

| Typing method | Simpson's Discriminatory index |
|---------------|--------------------------------|
| ERIC-PCR      | 0.8704                         |
| MALDI-TOF     | 0.5001                         |

139

## 140 **Discussion**

141 Given the high prevalence of MDR *K. pneumoniae*, it is essential to understand and establish the clonal  
142 relatedness among isolates to prevent and control *K. pneumoniae* outbreaks in a healthcare setting. Various  
143 molecular typing methods such as multilocus sequence typing (MLST), pulsed-field gel electrophoresis  
144 (PFGE), plasmid typing, antibiogram typing and ribotyping have been used for epidemiological and  
145 surveillance studies. However, many of these are expensive, labor intensive and time-consuming. Methods  
146 such as palindromic repetitive element-based ERIC-PCR and proteomic signature based MALDI-TOF are  
147 quick, reliable, and cost-effective techniques for molecular typing of the Enterobacteriaceae family. We  
148 therefore studied these tools to determine the transmission dynamics of MDR *K. pneumoniae* in hospital  
149 settings.

150 *Klebsiella pneumoniae* is a problem pathogen with a high incidence of multidrug resistant strains. To study  
151 the epidemiological relatedness among the MDR *K. pneumoniae* isolates and to find out the possibility of  
152 any plausible outbreak, we designed this study comparing two methods for typing, one based on the  
153 genotype (ERIC-PCR) and another on the basis of protein profiling (MALDI-TOF). The importance of  
154 molecular typing of MDR- *K. pneumoniae* by these methods is in strengthening the epidemiological

155 surveillance and to recognize the clonal spread in a rapid and cost-effective manner in comparison to WGS  
156 based surveillance. We analyzed a total of 137 isolates and found the genotyping-based method to be more  
157 robust and discriminatory than MALDI-TOF as indicated by the Simpson's diversity index value (for  
158 ERIC-PCR,  $D=0.8704$ ).

159 In this study, 45% isolates were related to wound pus followed by 28% from blood and 22% from  
160 respiratory specimens (Fig 3). ERIC-PCR devised phylogenetic group E1 was most prevalent (29%) and  
161 represented a dominant clone, followed by E11 (12.4%) and E19 (8.7%). Out of the 40 isolates from E1  
162 phylogenetic group 13 isolates were collected from general outpatient department (OPD), 7 from AGE-  
163 ICU and rest of the isolates from other indoor and outpatient hospital units/wards. Similarly, isolates  
164 belonging to other ERIC phylogenetic groups were sampled from different indoor and outpatient hospital  
165 units/wards. Our observations revealed that no outbreak or nosocomial clustering happened during the  
166 designated period of sampling.

167 MALDI typing showed a group G6 (68%) was most prevalent followed by G3 (19%). The unit/ward data  
168 also did not show any correlation with MALDI groups; supporting our observation from ERIC-PCR data.  
169 Both the techniques indicated the convergent result of no likely outbreak/nosocomial spread of MDR *K.*  
170 *pneumoniae* isolates during the study period. Although both the tools provided convergent outcomes (Fig  
171 6), ERIC-PCR was a better tool with Simpson's diversity Index ( $D=0.8704$ ) approaching close to numerical  
172 value of one. Of the 137 MDR *K. pneumoniae* isolates used in this study, ERIC-PCR revealed 40 (E1-E40)  
173 and MALDI-TOF revealed 6 (G1-G6) distinct groups. Among the isolates that were classified as very  
174 closely related based on their MALDI-TOF dendrogram, the ERIC-PCR banding patterns showed lack of  
175 genetic relatedness, thereby highlighting the difference in clustering the isolates based on genomic versus  
176 proteomic signatures. The large number of serotypes in this species could also explain this genetic diversity  
177 highlighted by the ERIC-PCR genotypic analysis. Similar to other studies, in our study the clustering  
178 pattern by MALDI-TOF was different compared to that seen with ERIC-PCR based techniques (14,15).  
179 This might be because of the fact that phenotype expressed is not always the true representative of genotype.



180 In this study, the discriminatory indices for ERIC-PCR and MALDI-TOF were performed. Comparison  
181 between these two methods revealed the higher discrimination index for ERIC-PCR than MALDI -TOF,  
182 but results were not comparable. ERIC-PCR banding pattern gave a meaningful clustering with a Simpson's  
183 Discriminatory index of 0.8704. Proteomics based MALDI-TOF clustering showed that the *Klebsiella*  
184 *pneumoniae* isolates tested were heterogeneous and clonal relatedness could not be depicted as Simpson's  
185 Discriminatory index was 0.5001. Similar to our study Rim et al found MALDI-TOF to have  
186 low/insufficient discriminatory power to determine the relatedness of MDR-*Acinetobacter baumannii*  
187 isolates (16). A recent study by Purighalla S et al., have the supporting results indicating ERIC being more  
188 reproducible and better tool than MALDI-TOF to determine the relatedness of nosocomial *K. pneumoniae*  
189 isolates (14) though with routine use of MALDI for microbial identification, it is also being used for  
190 outbreak investigations with no added cost for effective interventions (17,18). Although MALDI-TOF is a  
191 quick and easy technique and can speed up the infection control measures to prevent further outbreak (19),  
192 it does not fit in every situation for perfect discrimination (20). Maskit Bar-Meir also supported the  
193 integration of MALDI-TOF-MS, primarily for species identification and only secondarily for  
194 epidemiological typing (21). Various studies show that MALDI biotyper has limited ability to provide  
195 protein fingerprinting because it targets ribosomal proteins in the limited range of 2-20 kD which is  
196 adequate for identification but shows restricted ability to differentiate isolates to the level of clonal complex.  
197 Also, there are scopes of improvement for MALDI-TOF MS as a tool for biotyping as its performance also  
198 varies based on modification of the growth conditions and extraction method (21, 22).

199 **Conclusion:** Although genomic tools have good discriminatory power but are costly, labour intensive and  
200 demand expert handling. ERIC -PCR profiles provide good discriminatory power to find out the clonal  
201 relatedness to describe any likely epidemiological outbreak for MDR *K. pneumoniae* isolates. This  
202 phlotyping tool is easy, fast, cost effective and can be easily adapted to high throughput analysis of isolates  
203 for meaningful clustering.

204 **Conflicts of Interest:** All the authors declare that there are no conflicts of interest regarding the publication  
205 of this article.

206 **Funding disclosure and Acknowledgements:** This research work was partially funded by ICMR, India,  
207 New Delhi, Ref. No. AMR/158/2018-ECD-II /2020.

208 **Author's role:**

209 JK: Conceptualization, data curation/analysis and visualization, Writing -Original Draft Preparation,  
210 Conducting experimentation, Validation.

211 SK: Data curation/analysis and visualization, manuscript writing-reviewing/editing, validation.

212 MK: Sample collection and processing.

213 SR: Sample collection, conducting experimentation, reviewing.

214 AA: Project administration, Reviewing and editing the manuscript, Data validation, Supervision.

215 MB: Reviewing and editing the manuscript, supervision.

216 KW: Reviewing the manuscript, Data validation, supervision

217 PR: Supervision, Project administration, Reviewing and editing the manuscript, Resources.

218 **References:**

219 1. Navon-Venezia, S., K. Kondratyeva, and A. Carattoli, *Klebsiella pneumoniae*: a major worldwide  
220 source and shuttle for antibiotic resistance. *FEMS Microbiology Reviews*. **41**(3): p. 252-275.

221 2. Giske CG, Monnet DL, Cars O, Carmeli Y; ReAct-Action on Antibiotic Resistance. Clinical and  
222 economic impact of common multidrug-resistant gram-negative bacilli. *Antimicrob Agents*  
223 *Chemother*. 2008 Mar;52(3):813-21. doi: 10.1128/AAC.01169-07. Epub 2007 Dec 10.

224 3. Campos AC, Albiero J, Ecker AB, Kuroda CM, Meirelles LE, Polato A, Tognim MC, Wingeter  
225 MA, Teixeira JJ. Outbreak of *Klebsiella pneumoniae* carbapenemase-producing *K pneumoniae*: A  
226 systematic review. *Am J Infect Control*. 2016 Nov 1;44(11):1374-1380. doi:  
227 10.1016/j.ajic.2016.03.022. Epub 2016 May 5.

- 228 4. Reyes J, Aguilar AC, Caicedo A. Carbapenem-Resistant *Klebsiella pneumoniae*: Microbiology Key  
229 Points for Clinical Practice. Int J Gen Med. 2019;12:437-446. Published 2019 Nov 28.  
230 doi:10.2147/IJGM.S214305
- 231 5. World Health Organization. (2017). Prioritization of pathogens to guide discovery, research and  
232 development of new antibiotics for drug-resistant bacterial infections, including tuberculosis. World  
233 Health Organization. <https://apps.who.int/iris/handle/10665/311820>
- 234 6. Xercavins, M., Jiménez, E., Padilla, E. et al. High clonal diversity of ESBL-producing *Klebsiella*  
235 *pneumoniae* isolates from clinical samples in a non-outbreak situation. A cohort study. Antimicrob  
236 Resist Infect Control **9**, 5 (2020). <https://doi.org/10.1186/s13756-019-0661-9>
- 237 7. Quiñones D, Valverde A, Rodríguez-Baños M, Kobayashi N, Zayaz A, Abreu M, Cantón R, del  
238 Campo R. High clonal diversity in a non-outbreak situation of clinical ESBL-producing *Klebsiella*  
239 *pneumoniae* isolates in the first national surveillance program in Cuba. Microb Drug Resist. 2014  
240 Feb;20(1):45-51. doi: 10.1089/mdr.2013.0021. Epub 2013 May 21. PMID: 23692050.
- 241 8. Souverein D, Boers SA, Veenendaal D, Euser SM, Kluytmans J, Den Boer JW (2014) Polyclonal  
242 Spread and Outbreaks with ESBL Positive Gentamicin Resistant *Klebsiella* spp. in the Region  
243 Kennemerland, The Netherlands. PLoS ONE 9(6): e101212.  
244 <https://doi.org/10.1371/journal.pone.0101212>
- 245 9. Versalovic J, Koeuth T, Lupski JR. Distribution of repetitive DNA sequences in eubacteria and  
246 application to fingerprinting of bacterial genomes. Nucleic Acids Res. 1991;19(24):6823-6831.  
247 doi:10.1093/nar/19.24.6823
- 248 10. CLSI. Performance Standards for Antimicrobial Susceptibility Testing. 29th ed. CLSI supplement  
249 M100. Wayne, PA: Clinical and Laboratory Standards Institute; 2019
- 250 11. Dallenne C, Da Costa A, Decré D, Favier C, Arlet G. Development of a set of multiplex PCR assays

- 251 for the detection of genes encoding important beta-lactamases in Enterobacteriaceae. J Antimicrob  
252 Chemother. 2010 Mar;65(3):490-5. doi: 10.1093/jac/dkp498. Epub 2010 Jan 12. PMID: 20071363.
- 253 12. Pavel, A.B., Vasile, C.I. PyElph - a software tool for gel images analysis and phylogenetics. BMC  
254 Bioinformatics **13**, 9 (2012). <https://doi.org/10.1186/1471-2105-13-9>
- 255 13. Hunter PR, Gaston MA. Numerical index of the discriminatory ability of typing systems: an  
256 application of Simpson's index of diversity. J Clin Microbiol. 1988 Nov;26(11):2465-6. doi:  
257 10.1128/jcm.26.11.2465-2466.1988. PMID: 3069867; PMCID: PMC266921.
- 258 14. Purighalla S, Esakimuthu S, Reddy M, Varghese GK, Richard VS, Sambandamurthy VK.  
259 Discriminatory power of three typing techniques in determining relatedness of  
260 nosocomial *Klebsiella pneumoniae* isolates from a tertiary hospital in India. Indian J Med  
261 Microbiol. 2017 Jul-Sep;35(3):361-368. doi: 10.4103/ijmm.IJMM\_16\_308. PMID: 29063880.
- 262 15. Sachse S, Bresan S, Erhard M, Edel B, Pfister W, Saupe A, Rödel J. Comparison of multilocus  
263 sequence typing, RAPD, and MALDI-TOF mass spectrometry for typing of  $\beta$ -lactam-resistant  
264 *Klebsiella pneumoniae* strains. Diagn Microbiol Infect Dis. 2014 Dec;80(4):267-71. doi:  
265 10.1016/j.diagmicrobio.2014.09.005. Epub 2014 Sep 16. PMID: 25266674.
- 266 16. Rim JH, Lee Y, Hong SK, Park Y, Kim M, D'Souza R, Park ES, Yong D, Lee K. Insufficient  
267 Discriminatory Power of Matrix-Assisted Laser Desorption Ionization Time-of-Flight Mass  
268 Spectrometry Dendrograms to Determine the Clonality of Multi-Drug-Resistant *Acinetobacter*  
269 *baumannii* Isolates from an Intensive Care Unit. Biomed Res Int. 2015;2015:535027. doi:  
270 10.1155/2015/535027. Epub 2015 May 25. PMID: 26101775; PMCID: PMC4458526.
- 271 17. Angrup A, Krishnamoorthi S, Biswal M, Gautam V, Ray P, Agarwal A, Dogra MR, Singh R, Katoch  
272 D, Gupta V. Utility of MALDI-TOF mass spectrometry in an outbreak investigation of acute  
273 endophthalmitis following intravitreal injection. J Hosp Infect. 2018 Dec;100(4):e253-e256. doi:  
274 10.1016/j.jhin.2018.03.032. Epub 2018 Mar 30. PMID: 29605188.

- 275 18. Patel R. Matrix-assisted laser desorption ionization-time of flight mass spectrometry in clinical  
276 microbiology. *Clin Infect Dis*. 2013 Aug;57(4):564-72. doi: 10.1093/cid/cit247. Epub 2013 Apr 17.  
277 PMID: 23595835
- 278 19. Sauer S, Kliem M. Mass spectrometry tools for the classification and identification of bacteria. *Nat*  
279 *Rev Microbiol*. 2010 Jan;8(1):74-82. doi: 10.1038/nrmicro2243. PMID: 20010952.
- 280 20. Bernardo K, Pakulat N, Macht M, Krut O, Seifert H, Fleer S, Hüngrer F, Krönke M. Identification  
281 and discrimination of *Staphylococcus aureus* strains using matrix-assisted laser  
282 desorption/ionization-time of flight mass spectrometry. *Proteomics*. 2002 Jun;2(6):747-53. doi:  
283 10.1002/1615-9861(200206)2:6<747:AID-PROT747>3.0.CO;2-V.
- 284 21. Bar-Meir M, Berliner E, Kashat L, Zeevi DA, Assous MV. The utility of MALDI-TOF MS for  
285 outbreak investigation in the neonatal intensive care unit. *Eur J Pediatr*. 2020 Dec;179(12):1843-  
286 1849. doi: 10.1007/s00431-020-03696-3. Epub 2020 Jun 10. PMID: 32524198; PMCID:  
287 PMC7283987.
- 288 22. Suarez, S., Ferroni, A., Lotz, A., Jolley, K. A., Guérin, P., Leto, J., Dauphin, B., Jamet, A., Maiden,  
289 M. C., Nassif, X., & Armengaud, J. Ribosomal proteins as biomarkers for bacterial identification by  
290 mass spectrometry in the clinical microbiology laboratory. *Journal of microbiological methods*.  
291 2013; 94(3), 390–396. <https://doi.org/10.1016/j.mimet.2013.07>.

292

293

294

295

296

297 **Legends to figures :**

298 **Fig 1:** Dendrogram generated with neighbor end joining and the UPGMA clustering methods, showing the  
299 genetic similarity among *K. pneumoniae* isolates by enterobacterial repetitive intergenic consensus (ERIC)  
300 genotyping.

301 **Fig 2: MALDI-TOF dendrogram-** phylogenetic tree was constructed from main spectrum profiles of all  
302 the isolates using Flexcontrol software (version 3.4.127.0) and Biotyper software (version 3.1). Colour  
303 coding indicates the MALDI types of the isolates.

304 **Fig 3:** Distribution of clinical isolates as per the origin of sample collection.

305 **Fig 4:** Heat map representing the carbapenemases/ESBL gene distribution with respect to isolates from  
306 different hospital units/wards.

307 **Fig 5:** ERIC typing of the isolates as per the sample collection site/ward/unit.

308 **Fig 6:** Convergent results with ERIC and MALDI-TOF as typing tools for relatedness of clinical isolates.  
309 As depicted in the bar graph ERIC has better discriminatory power for large sample size in comparison to  
310 MALDI-TOF.



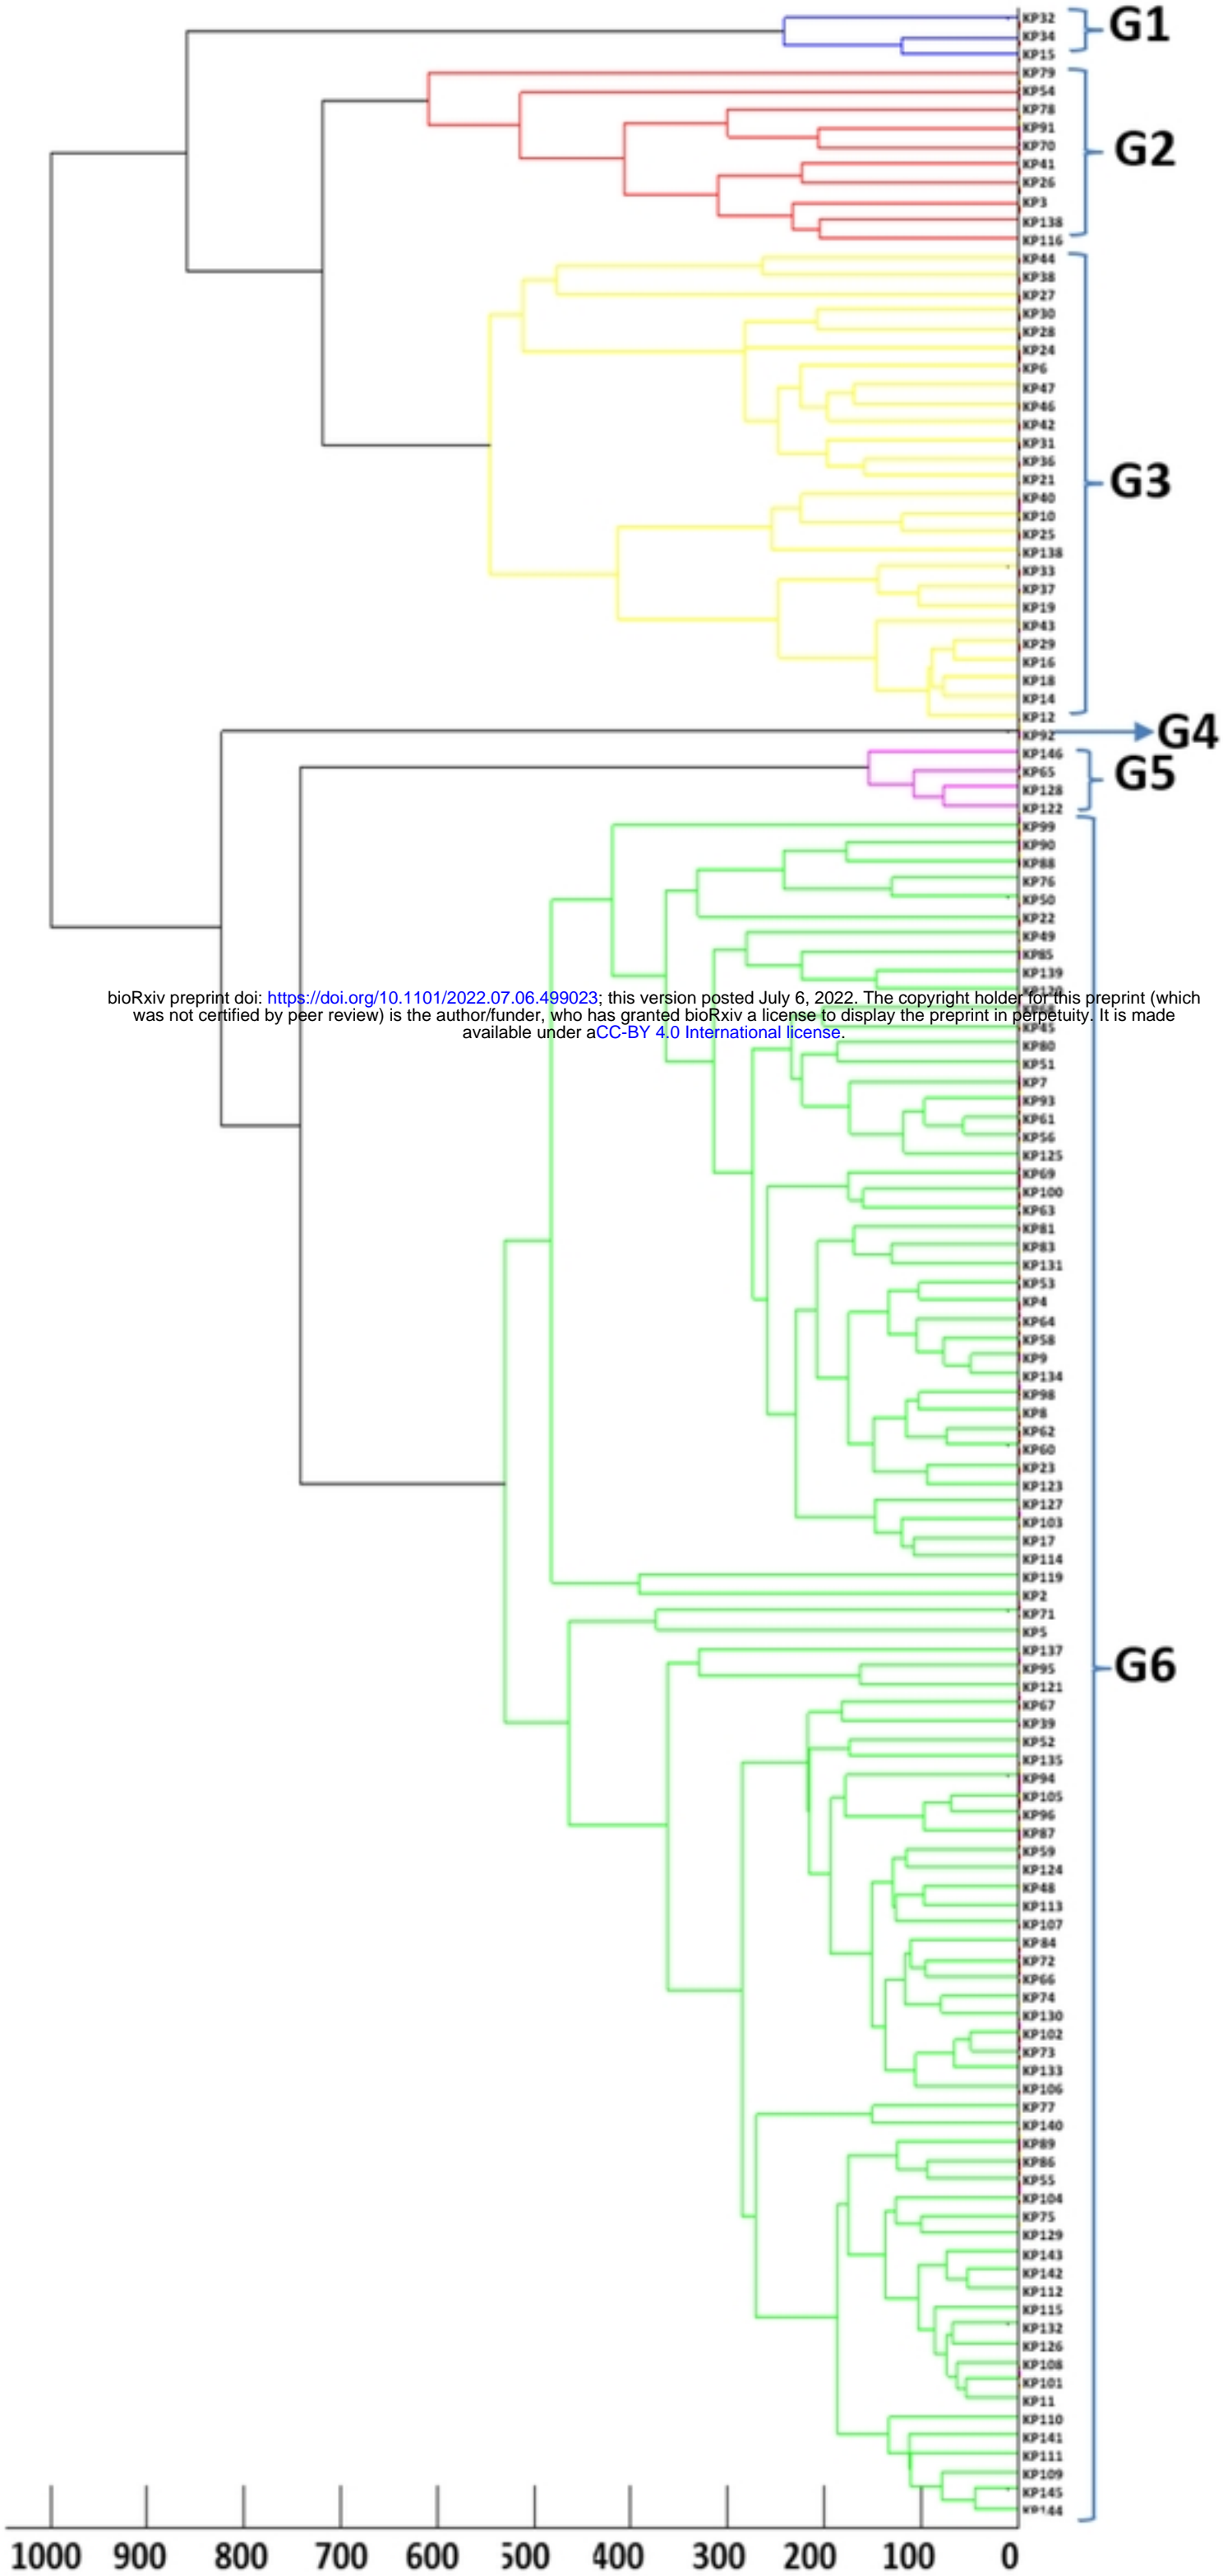

Figure 2



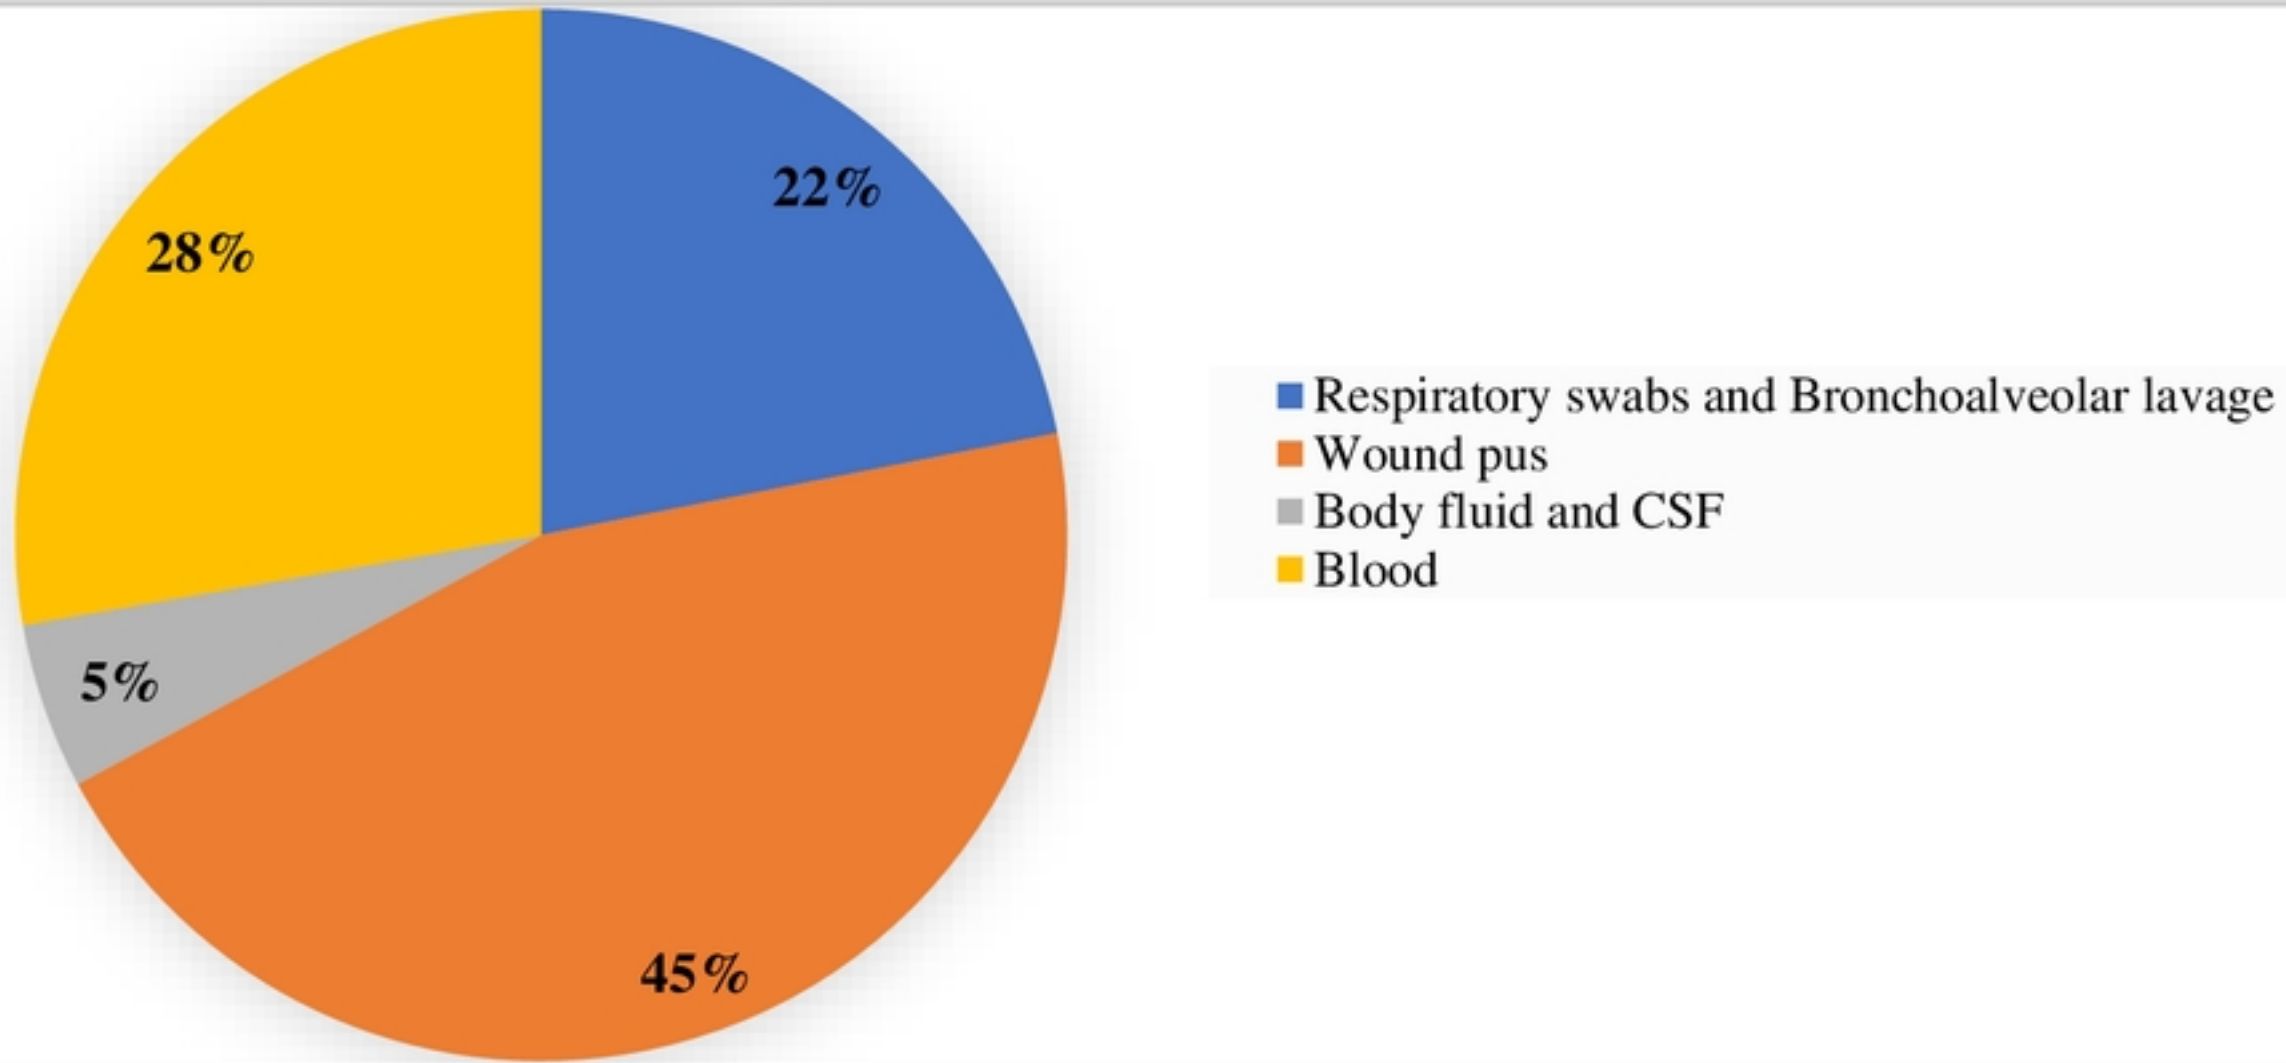

Figure 3

bioRxiv preprint doi: <https://doi.org/10.1101/2022.07.06.499028>; this version posted July 6, 2022. The copyright holder for this preprint (which was not certified by peer review) is the author/funder, who has granted bioRxiv a license to display the preprint in perpetuity. It is made available under aCC-BY 4.0 International license.

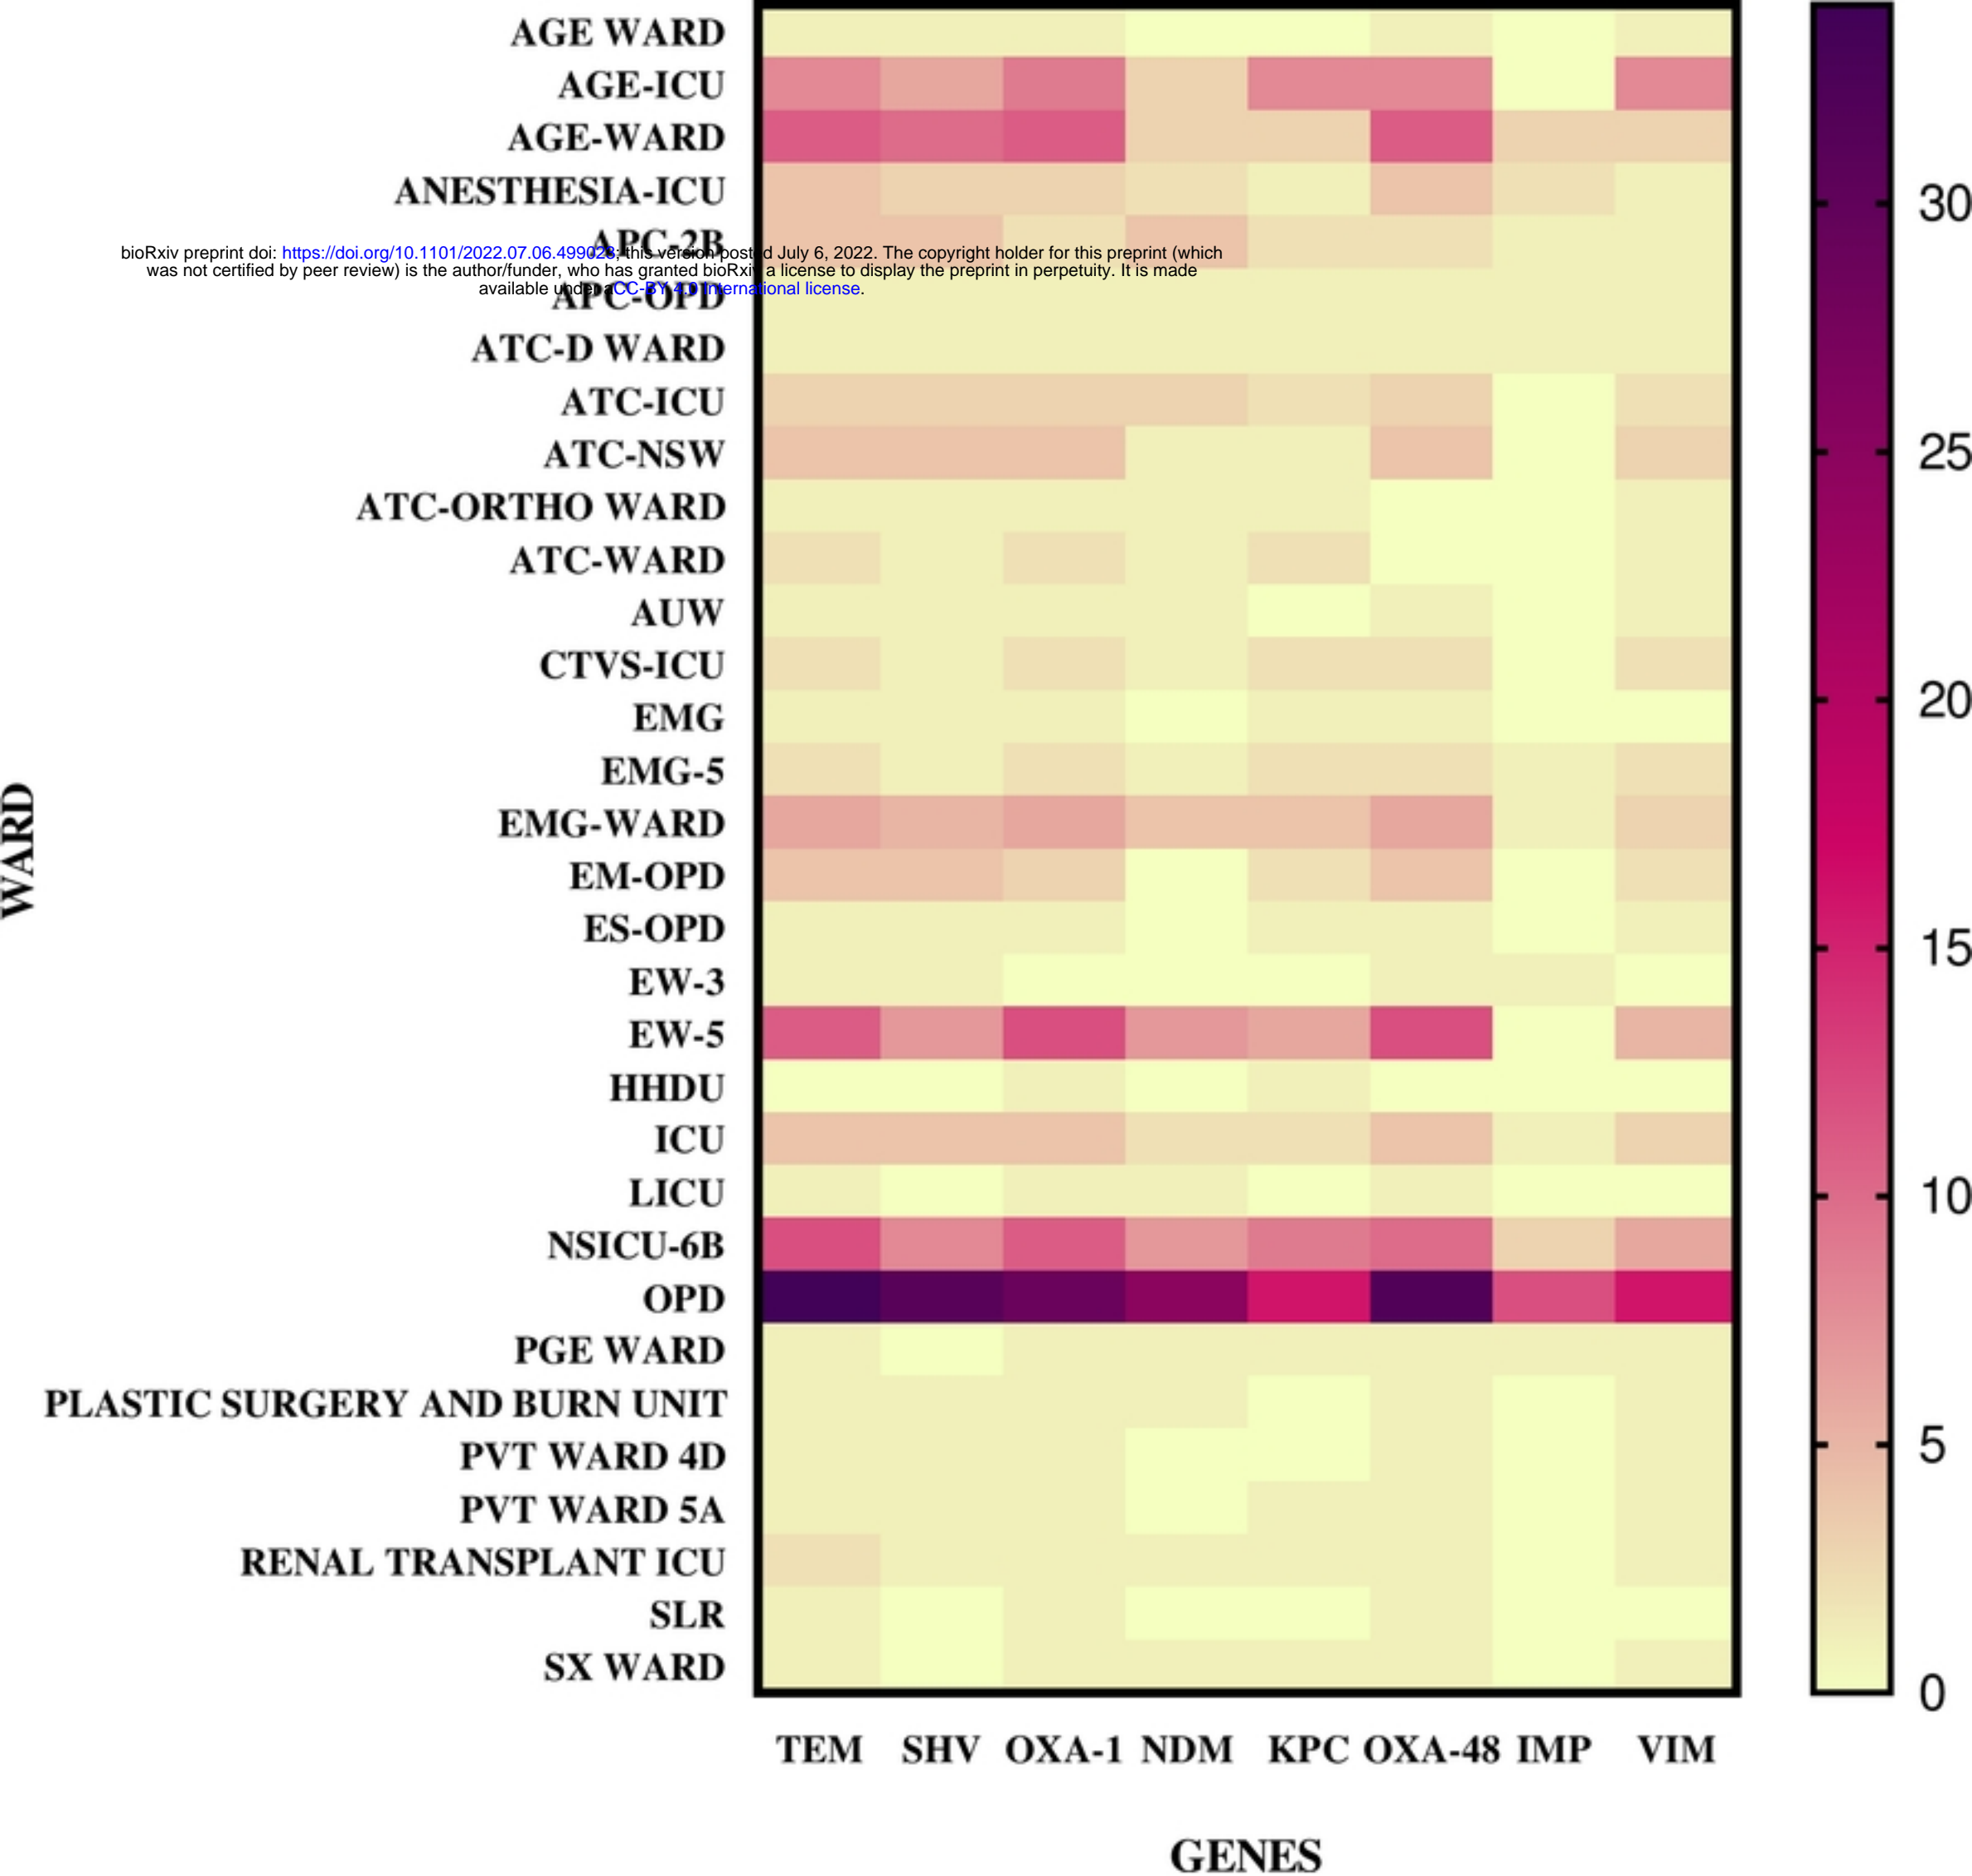

Figure 4

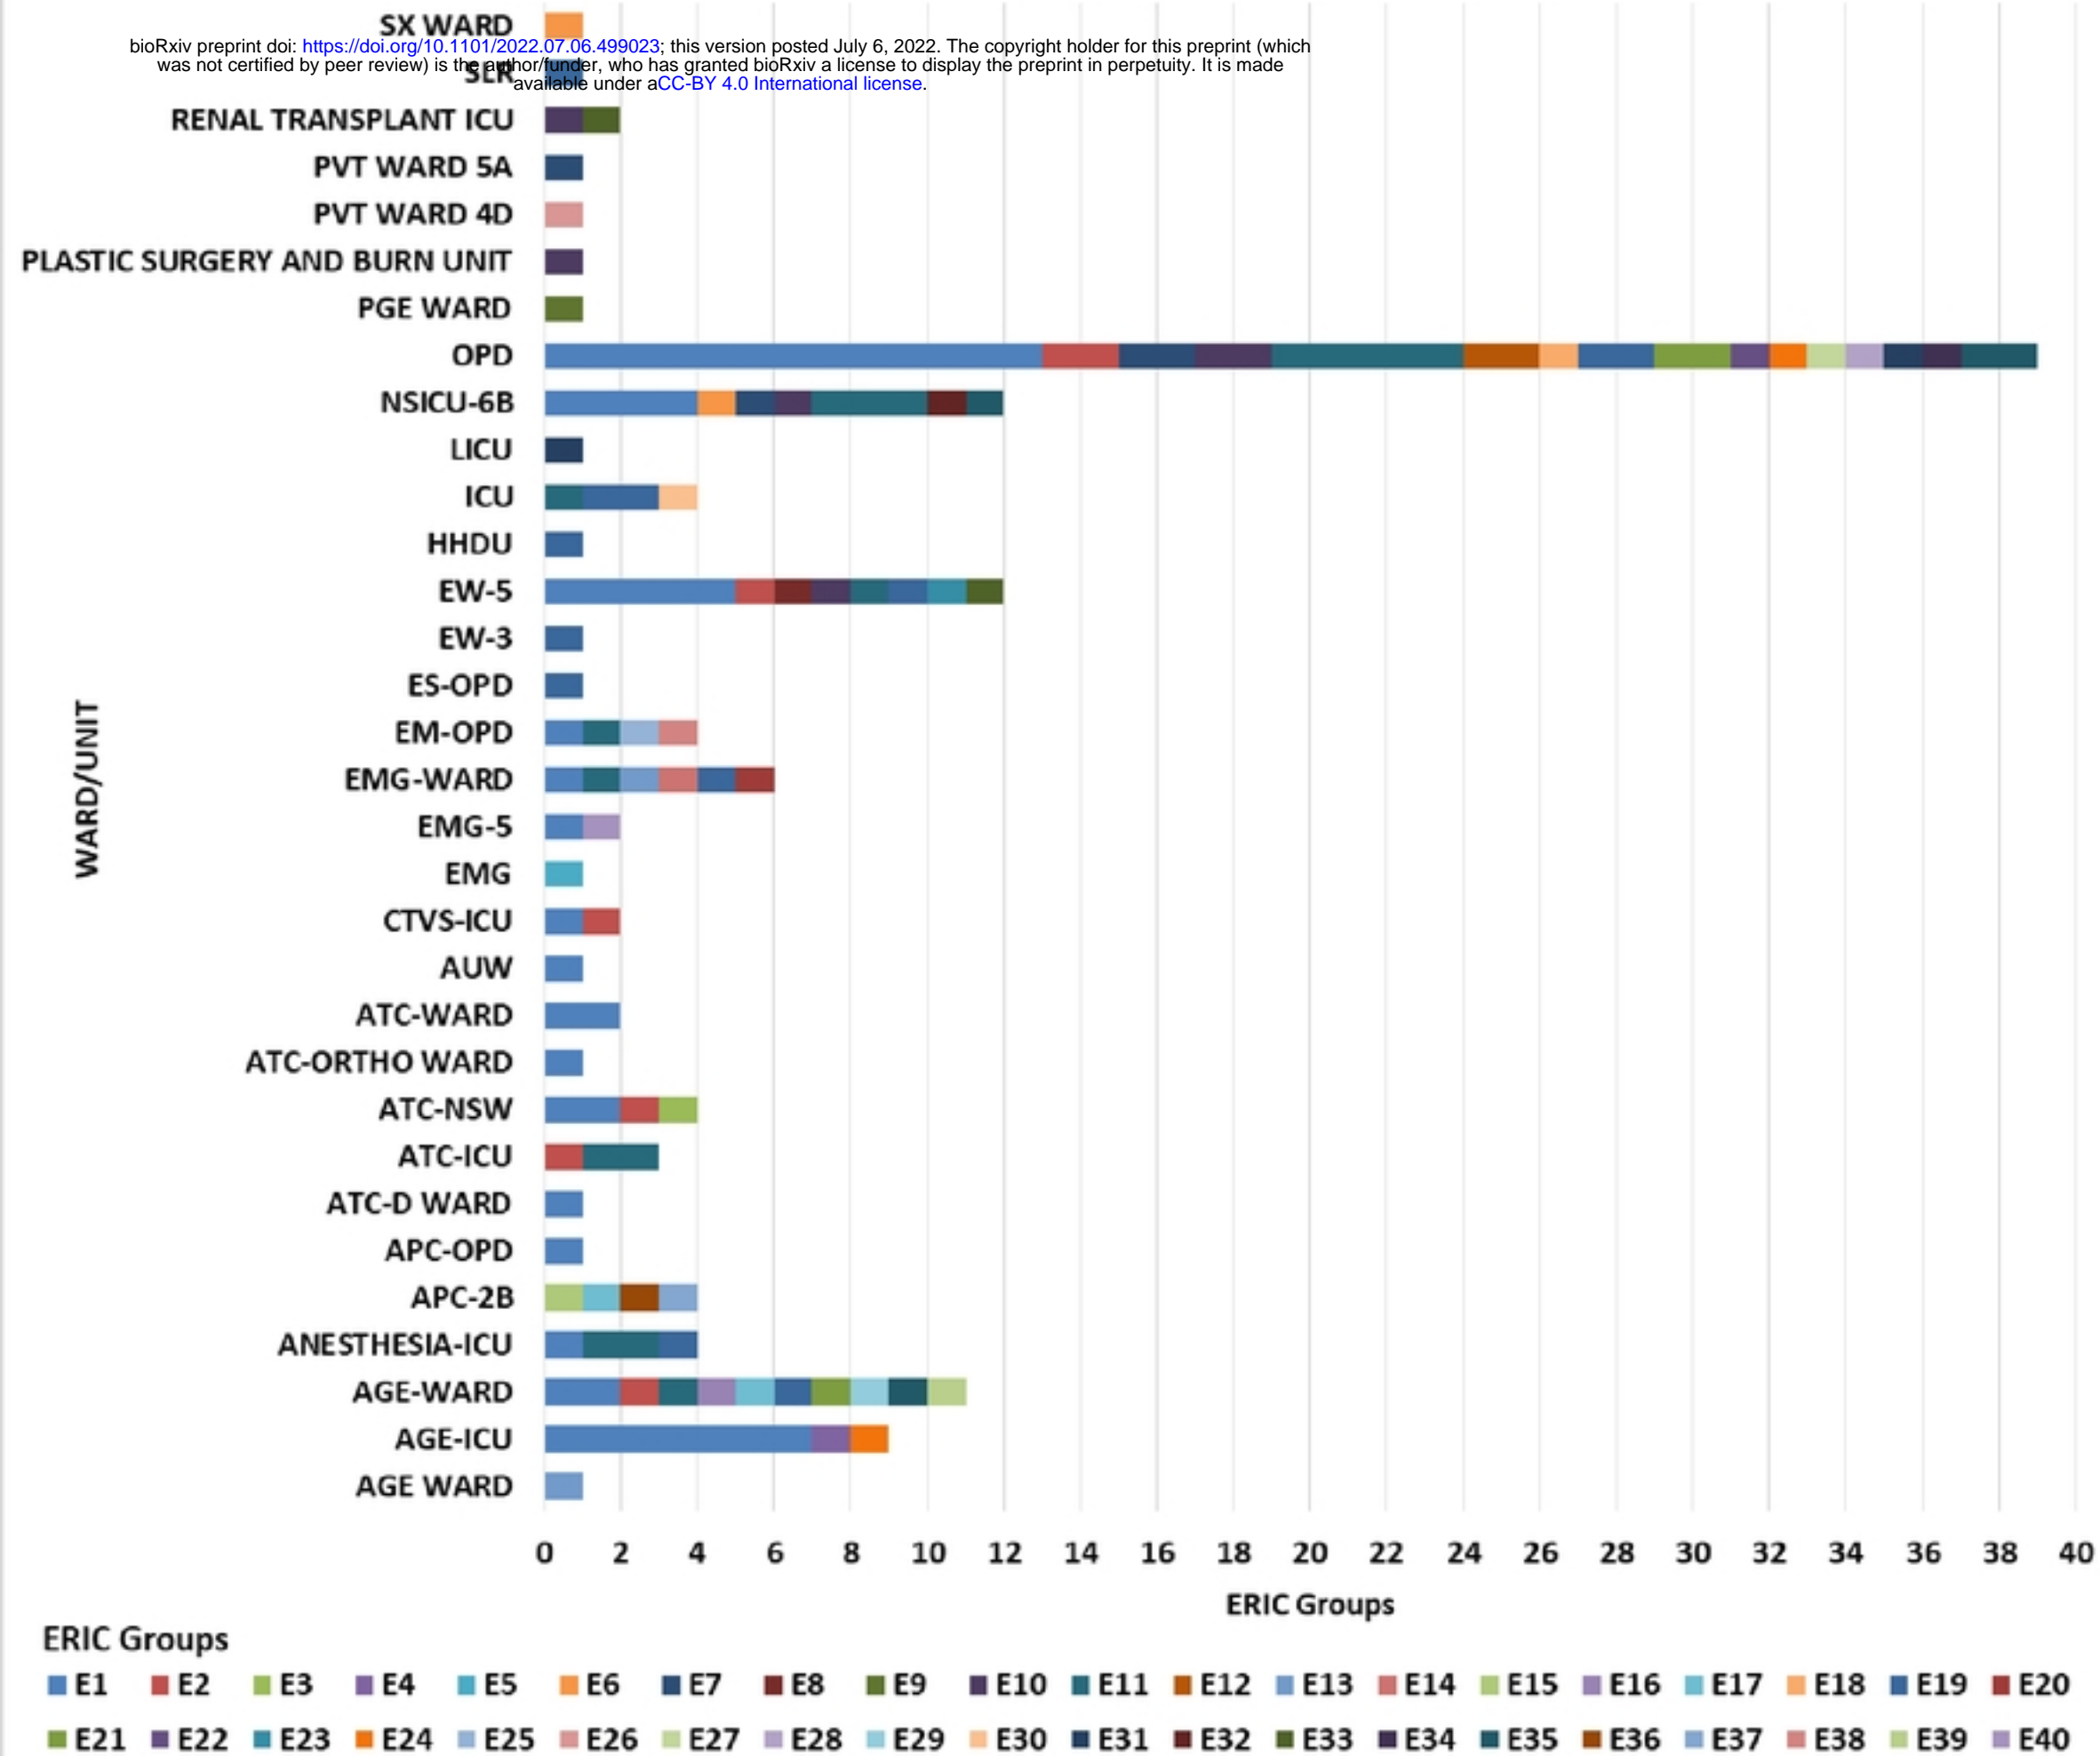

Figure 5

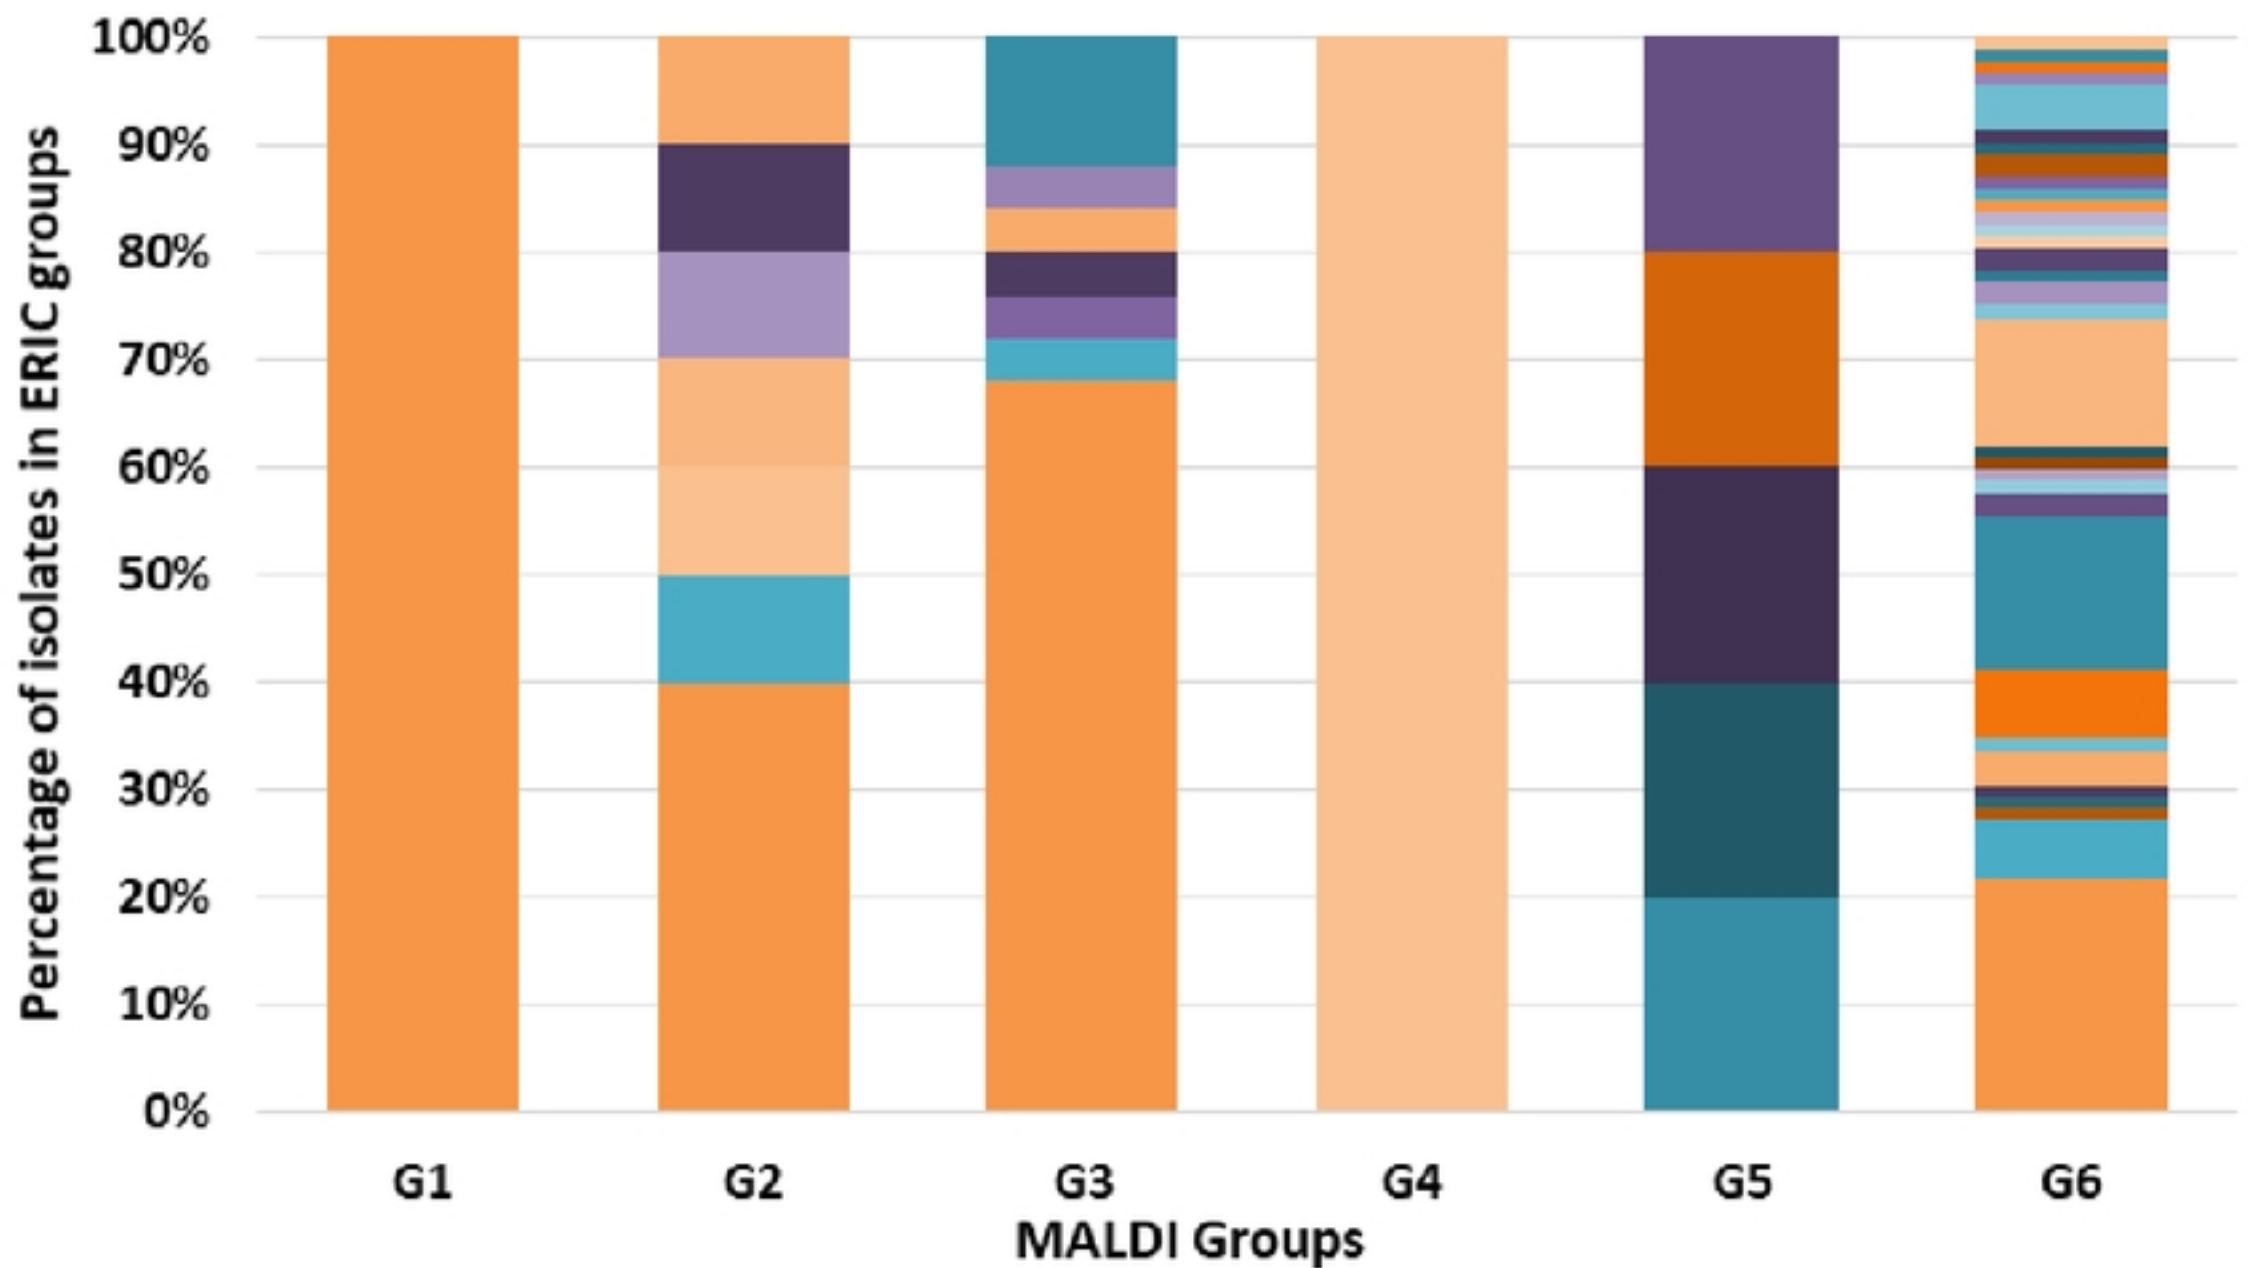

Figure 6
